# Supplementary material
Source: PubMed Central journal article supplement (PMC6259323)
Supplement: supplementary_material2.pdf [file supplementary_material2.pdf]

## Supplemental Data

### Imaging microglial activation and amyloid burden in amnesic mild cognitive impairment

Dunja Knezevic<sup>1,2</sup>, MSc; Nicolaas Paul LG Verhoeff<sup>1,3</sup>, MD, PhD; Sina Hafizi<sup>1</sup>, MD; Antonio P Strafella<sup>1,2,4</sup>, MD, PhD; Ariel Graff-Guerrero<sup>1,2</sup>, MD, PhD; Tarek Rajji<sup>1,2</sup>, MD; Bruce G Pollock<sup>1,2</sup>, MD, PhD; Sylvain Houle<sup>1,2</sup>, MD, PhD; Pablo M Rusjan<sup>1,2</sup>, PhD; Romina Mizrahi<sup>1,2</sup>, MD, PhD.

1. University of Toronto, Toronto, Ontario, Canada
2. Centre for Addiction and Mental Health, Toronto, Ontario, Canada
3. Baycrest Health Sciences, Toronto, Ontario, Canada
4. Toronto Western Hospital, University Health Network, University of Toronto, Toronto, Ontario, Canada

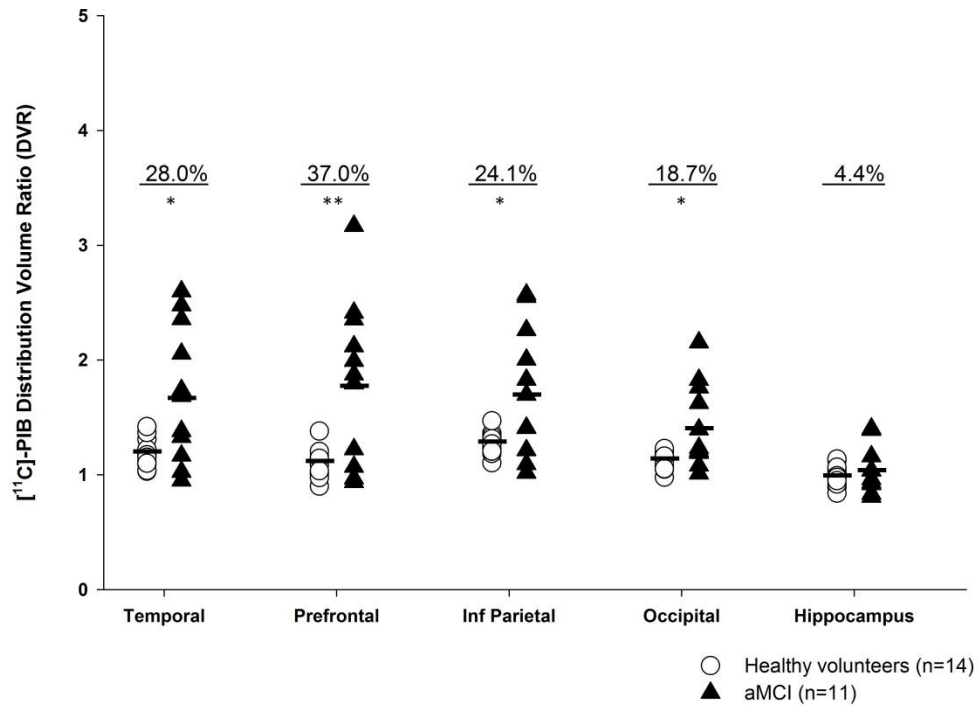

**Figure 1.** [<sup>11</sup>C]-PIB Distribution Value Ratio (DVR) in regions of interest. aMCI participants (n=11) had higher [<sup>11</sup>C]-PIB binding in all regions except hippocampus. The cerebellum was used as a reference region. \*p≤0.05, \*\*p<0.01

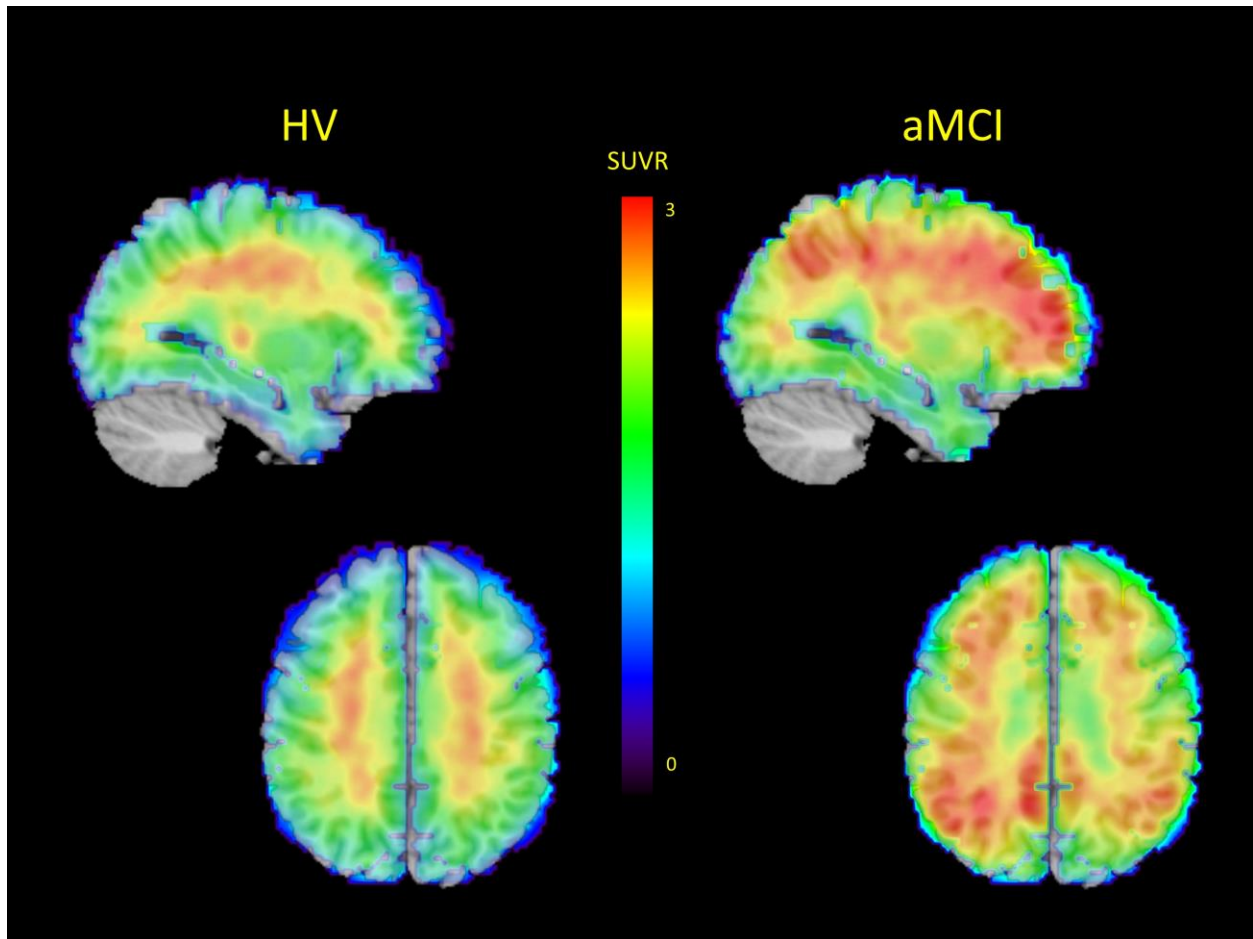

**Figure 2. Parametric images of [<sup>11</sup>C]-PIB standardized uptake value ratios (SUVR) overlaid on T1-weighted magnetic resonance imaging (MRI) template. The cerebellum was used as a reference region. Voxel threshold was set to  $p < 0.05$  (FWE corrected).**

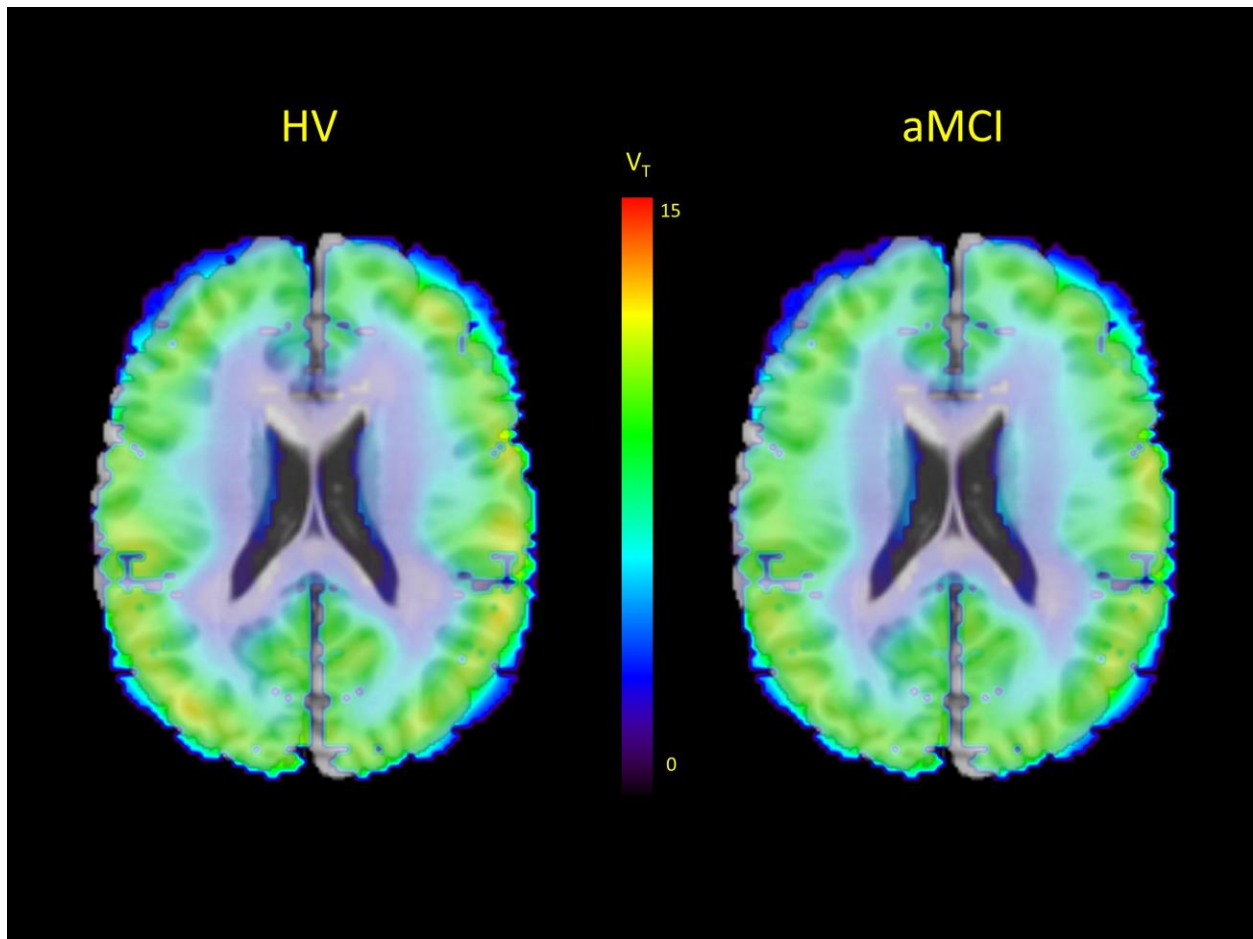

**Figure 3.** Parametric images of [ $^{18}\text{F}$ ]-FEPPA total distribution volume ( $V_T$ ) overlaid on T1-weighted magnetic resonance imaging (MRI) template. Voxel threshold was set to  $p < 0.05$  (FWE corrected).

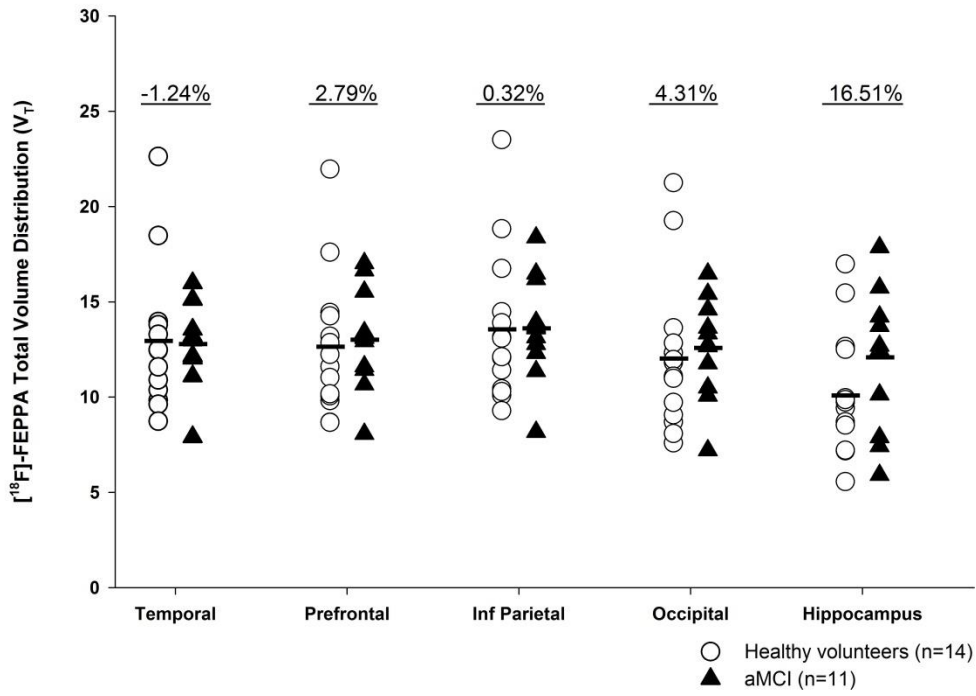

**Figure 4.  $[^{18}\text{F}]\text{-FEPPA}$  Total Volume Distribution ( $V_T$ ) in regions of interest. No significant differences were observed between aMCI participants (n=11) and healthy volunteers (n=14).**

**Table 1. [<sup>18</sup>F]-FEPPA Standardized Uptake Value Ratios (SUVR).** The standard uptake value between 90-120 minutes in an ROI was normalized to the standard uptake value of the cerebellum between 90-120 minutes. The ratio for each ROI, along with the percent difference is shown.

A. Before partial volume correction

| Region       | HV (n=14) |      | aMCI (n=11) |      | % Diff between HV and aMCI | t      | p     |
|--------------|-----------|------|-------------|------|----------------------------|--------|-------|
|              | mean      | SD   | mean        | SD   |                            |        |       |
| Temporal     | 0.99      | 0.08 | 0.97        | 0.07 | -1.92                      | -0.647 | 0.524 |
| Prefrontal   | 0.92      | 0.08 | 0.93        | 0.08 | 1.43                       | 0.419  | 0.679 |
| Inf Parietal | 1.03      | 0.09 | 1.01        | 0.05 | -1.37                      | -0.479 | 0.636 |
| Occipital    | 0.95      | 0.09 | 0.97        | 0.07 | 2.72                       | 0.793  | 0.436 |
| Hippocampus  | 0.74      | 0.08 | 0.77        | 0.11 | 4.55                       | 0.865  | 0.396 |

B. After partial volume correction

| Region       | HV (n=14) |      | aMCI (n=11) |      | % Diff between HV and aMCI | t     | p     |
|--------------|-----------|------|-------------|------|----------------------------|-------|-------|
|              | mean      | SD   | mean        | SD   |                            |       |       |
| Temporal     | 1.15      | 0.14 | 1.20        | 0.12 | 4.77                       | 1.046 | 0.307 |
| Prefrontal   | 1.32      | 0.15 | 1.39        | 0.11 | 5.41                       | 1.324 | 0.199 |
| Inf Parietal | 1.41      | 0.21 | 1.47        | 0.14 | 4.01                       | 0.682 | 0.453 |
| Occipital    | 1.37      | 0.17 | 1.49        | 0.25 | 8.58                       | 0.176 | 0.177 |
| Hippocampus  | 0.78      | 0.14 | 0.88        | 0.19 | 12.04                      | 0.533 | 0.174 |

**Table 2. Regional [ $^{18}\text{F}$ ]-FEPPA  $V_T$  for HV and aMCI participants when stratified by PIB status.** An average of 1.20 DVR in the cortical regions was used as a cut-off. No significant differences were observed between groups.

| Region            | HV (n=14)        |                  | aMCI (n=11)      |                  | % Difference between HV PIB- and aMCI PIB+ |
|-------------------|------------------|------------------|------------------|------------------|--------------------------------------------|
|                   | PIB- (n=11)      | PIB+ (n=3)       | PIB- (n=3)       | PIB+ (n=8)       |                                            |
| Temporal          | 13.32 $\pm$ 0.97 | 11.10 $\pm$ 1.78 | 10.29 $\pm$ 1.82 | 13.89 $\pm$ 1.20 | 4.28                                       |
| Prefrontal        | 13.22 $\pm$ 0.98 | 10.12 $\pm$ 1.80 | 10.44 $\pm$ 1.84 | 14.12 $\pm$ 1.21 | 6.81                                       |
| Inferior Parietal | 14.08 $\pm$ 1.05 | 11.19 $\pm$ 1.93 | 10.94 $\pm$ 1.98 | 14.76 $\pm$ 1.30 | 4.83                                       |
| Occipital         | 12.35 $\pm$ 1.08 | 10.38 $\pm$ 1.99 | 10.02 $\pm$ 2.04 | 13.71 $\pm$ 1.34 | 11.01                                      |
| Hippocampus       | 10.35 $\pm$ 1.03 | 8.60 $\pm$ 1.91  | 9.27 $\pm$ 1.96  | 13.34 $\pm$ 1.28 | 28.89                                      |

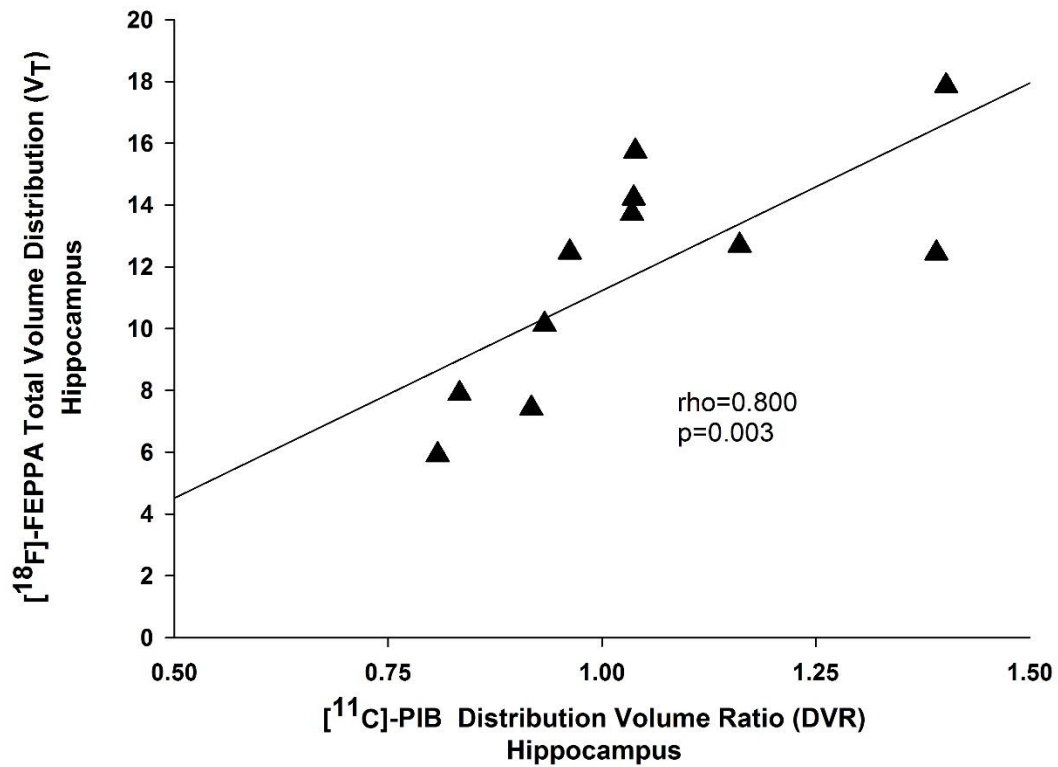

**Figure 5. Regional associations between [<sup>18</sup>F]-FEPPA and [<sup>11</sup>C]-PIB binding in hippocampus of aMCI participants (n=11) before partial volume correction.** The correlation in the hippocampus survived after Bonferroni correction for multiple comparisons.



**Table 4. Correlation analyses between [<sup>11</sup>C]-PIB DVR and neuropsychological score. Spearman's rank coefficient (rho).**

**A. Correlations before partial volume error correction.**

| Cognitive Measure<br>MCI (n=7) | MEMORY                       |       |                            |       |                                        |              | LANGUAGE          |       |                          |       |
|--------------------------------|------------------------------|-------|----------------------------|-------|----------------------------------------|--------------|-------------------|-------|--------------------------|-------|
|                                | RBANS<br>Immediate<br>Memory |       | RBANS<br>Delayed<br>Memory |       | Logical<br>Memory<br>Delayed<br>(n=11) |              | RBANS<br>Language |       | Verbal Fluency<br>(n=11) |       |
| DVR                            | rho                          | p     | rho                        | p     | rho                                    | p            | rho               | p     | rho                      | p     |
| Temporal                       | 0.071                        | 0.879 | -0.054                     | 0.908 | <b>-0.635</b>                          | <b>0.036</b> | -0.143            | 0.760 | 0.369                    | 0.264 |
| Prefrontal                     | 0.000                        | 1.000 | 0.432                      | 0.333 | -0.584                                 | 0.059        | 0.143             | 0.760 | 0.205                    | 0.545 |
| Inf Parietal                   | 0.286                        | 0.535 | -0.108                     | 0.818 | <b>-0.667</b>                          | <b>0.025</b> | -0.036            | 0.939 | 0.446                    | 0.169 |
| Occipital                      | 0.393                        | 0.383 | -0.180                     | 0.699 | -0.584                                 | 0.059        | -0.071            | 0.879 | 0.310                    | 0.354 |
| Hippocampus                    | -0.071                       | 0.879 | 0.162                      | 0.728 | -0.557                                 | 0.075        | -0.071            | 0.879 | -0.005                   | 0.989 |

| Cognitive Measure<br>MCI (n=7) | GENERAL COGNITION |       |        |       | ATTENTION                   |       | VISUOSPATIAL |       |                                |       |
|--------------------------------|-------------------|-------|--------|-------|-----------------------------|-------|--------------|-------|--------------------------------|-------|
|                                | MMSE              |       | MoCA   |       | RBANS<br>Attention<br>(n=7) |       | TMT Task A   |       | RBANS<br>Visuospatial<br>(n=7) |       |
| DVR                            | rho               | p     | rho    | p     | rho                         | p     | rho          | p     | rho                            | p     |
| Temporal                       | -0.302            | 0.367 | -0.169 | 0.619 | 0.055                       | 0.908 | 0.018        | 0.958 | 0.342                          | 0.452 |
| Prefrontal                     | -0.181            | 0.594 | -0.330 | 0.322 | 0.109                       | 0.816 | -0.127       | 0.709 | 0.252                          | 0.585 |
| Inf Parietal                   | -0.149            | 0.663 | -0.046 | 0.894 | 0.218                       | 0.638 | -0.018       | 0.958 | 0.523                          | 0.229 |
| Occipital                      | -0.306            | 0.360 | -0.078 | 0.820 | 0.273                       | 0.554 | 0.045        | 0.894 | 0.414                          | 0.355 |
| Hippocampus                    | -0.167            | 0.623 | -0.549 | 0.080 | -0.582                      | 0.170 | 0.009        | 0.979 | -0.198                         | 0.670 |

| Cognitive Measure<br>MCI (n=7) | EXECUTIVE FUNCTION |       |                                    |       |                                            |       |                                |       |
|--------------------------------|--------------------|-------|------------------------------------|-------|--------------------------------------------|-------|--------------------------------|-------|
|                                | TMT Task B         |       | Stroop Test<br>Color Task<br>(n=8) |       | Stroop Test<br>Color Word<br>Task<br>(n=8) |       | Letter Number<br>Span<br>(n=7) |       |
| DVR                            | rho                | p     | rho                                | p     | rho                                        | p     | rho                            | p     |
| Temporal                       | -0.191             | 0.574 | 0.109                              | 0.797 | -0.333                                     | 0.420 | 0.315                          | 0.491 |
| Prefrontal                     | -0.218             | 0.519 | 0.109                              | 0.797 | -0.167                                     | 0.693 | 0.315                          | 0.491 |
| Inf Parietal                   | -0.282             | 0.401 | 0.218                              | 0.604 | -0.357                                     | 0.385 | 0.315                          | 0.491 |
| Occipital                      | -0.127             | 0.709 | 0.218                              | 0.604 | -0.190                                     | 0.651 | 0.512                          | 0.240 |
| Hippocampus                    | -0.045             | 0.894 | -0.343                             | 0.406 | -0.310                                     | 0.456 | -0.335                         | 0.463 |

**B. Correlations after partial volume error correction**

| Cognitive Measure<br>MCI (n=7) | MEMORY                       |       |                            |       |                                        |              | LANGUAGE          |       |                          |       |
|--------------------------------|------------------------------|-------|----------------------------|-------|----------------------------------------|--------------|-------------------|-------|--------------------------|-------|
|                                | RBANS<br>Immediate<br>Memory |       | RBANS<br>Delayed<br>Memory |       | Logical<br>Memory<br>Delayed<br>(n=11) |              | RBANS<br>Language |       | Verbal Fluency<br>(n=11) |       |
| DVR                            | rho                          | p     | rho                        | p     | rho                                    | p            | rho               | p     | rho                      | p     |
| Temporal                       | 0.071                        | 0.879 | -0.054                     | 0.908 | <b>-0.635</b>                          | <b>0.036</b> | 0.143             | 0.760 | 0.369                    | 0.264 |
| Prefrontal                     | 0.000                        | 1.000 | 0.432                      | 0.333 | -0.584                                 | 0.059        | 0.143             | 0.760 | 0.205                    | 0.545 |
| Inf Parietal                   | 0.071                        | 0.879 | -0.054                     | 0.908 | <b>-0.676</b>                          | <b>0.022</b> | -0.143            | 0.760 | 0.456                    | 0.159 |
| Occipital                      | 0.393                        | 0.383 | -0.180                     | 0.699 | -0.525                                 | 0.097        | -0.071            | 0.879 | 0.287                    | 0.392 |
| Hippocampus                    | -0.321                       | 0.482 | 0.414                      | 0.355 | <b>-0.621</b>                          | <b>0.041</b> | 0.000             | 1.000 | 0.118                    | 0.729 |

| Cognitive Measure<br>MCI (n=7) | GENERAL COGNITION |       |        |       | ATTENTION                   |       | VISUOSPATIAL |       |                                |       |
|--------------------------------|-------------------|-------|--------|-------|-----------------------------|-------|--------------|-------|--------------------------------|-------|
|                                | MMSE              |       | MoCA   |       | RBANS<br>Attention<br>(n=7) |       | TMT Task A   |       | RBANS<br>Visuospatial<br>(n=7) |       |
| DVR                            | rho               | p     | rho    | p     | rho                         | p     | rho          | p     | rho                            | p     |
| Temporal                       | -0.302            | 0.367 | -0.169 | 0.619 | 0.055                       | 0.908 | 0.018        | 0.958 | 0.342                          | 0.452 |
| Prefrontal                     | -0.181            | 0.594 | -0.330 | 0.322 | 0.109                       | 0.816 | -0.127       | 0.709 | 0.252                          | 0.585 |
| Inf Parietal                   | -0.204            | 0.547 | -0.124 | 0.717 | 0.055                       | 0.908 | 0.000        | 1.000 | 0.342                          | 0.452 |
| Occipital                      | -0.330            | 0.322 | -0.027 | 0.936 | 0.273                       | 0.554 | 0.055        | 0.873 | 0.414                          | 0.355 |
| Hippocampus                    | -0.176            | 0.604 | -0.572 | 0.066 | -0.346                      | 0.448 | -0.100       | 0.770 | 0.072                          | 0.878 |

| Cognitive Measure<br>MCI (n=7) | EXECUTIVE FUNCTION |       |                                    |       |                                            |       |                                |       |
|--------------------------------|--------------------|-------|------------------------------------|-------|--------------------------------------------|-------|--------------------------------|-------|
|                                | TMT Task B         |       | Stroop Test<br>Color Task<br>(n=8) |       | Stroop Test<br>Color Word<br>Task<br>(n=8) |       | Letter Number<br>Span<br>(n=7) |       |
| DVR                            | rho                | p     | rho                                | p     | rho                                        | p     | rho                            | p     |
| Temporal                       | 0.191              | 0.574 | 0.109                              | 0.797 | -0.333                                     | 0.420 | 0.315                          | 0.491 |
| Prefrontal                     | -0.218             | 0.519 | 0.109                              | 0.797 | -0.167                                     | 0.693 | 0.315                          | 0.491 |
| Inf Parietal                   | -0.273             | 0.417 | 0.109                              | 0.797 | -0.405                                     | 0.320 | 0.315                          | 0.491 |
| Occipital                      | -0.118             | 0.729 | 0.218                              | 0.604 | -0.190                                     | 0.651 | 0.512                          | 0.240 |
| Hippocampus                    | -0.191             | 0.574 | -0.171                             | 0.685 | -0.333                                     | 0.420 | -0.256                         | 0.579 |

**Table 5. Correlation analyses between [<sup>18</sup>F]-FEPPA V<sub>T</sub> and neuropsychological score.** Spearman's rank coefficient (rho).

**A. Correlations before partial volume error correction.**

| Cognitive Measure<br>MCI (n=7) | MEMORY                       |       |                            |       |                                        |       | LANGUAGE          |       |                          |       |
|--------------------------------|------------------------------|-------|----------------------------|-------|----------------------------------------|-------|-------------------|-------|--------------------------|-------|
|                                | RBANS<br>Immediate<br>Memory |       | RBANS<br>Delayed<br>Memory |       | Logical<br>Memory<br>Delayed<br>(n=11) |       | RBANS<br>Language |       | Verbal Fluency<br>(n=11) |       |
| V <sub>T</sub>                 | rho                          | p     | rho                        | p     | rho                                    | p     | rho               | p     | rho                      | p     |
| Temporal                       | -0.214                       | 0.645 | 0.198                      | 0.670 | -0.406                                 | 0.215 | 0.321             | 0.482 | 0.542                    | 0.085 |
| Prefrontal                     | -0.071                       | 0.879 | 0.234                      | 0.613 | -0.365                                 | 0.269 | 0.464             | 0.294 | 0.533                    | 0.091 |
| Inf Parietal                   | -0.071                       | 0.879 | 0.631                      | 0.129 | -0.219                                 | 0.517 | 0.714             | 0.071 | 0.415                    | 0.205 |
| Occipital                      | -0.214                       | 0.645 | 0.324                      | 0.478 | -0.320                                 | 0.338 | 0.393             | 0.383 | 0.483                    | 0.132 |
| Hippocampus                    | 0.357                        | 0.432 | 0.054                      | 0.908 | -0.584                                 | 0.059 | 0.321             | 0.482 | 0.005                    | 0.989 |

| Cognitive Measure<br>MCI (n=7) | GENERAL COGNITION |       |        |       | ATTENTION                   |       | VISUOSPATIAL  |              |                                |       |
|--------------------------------|-------------------|-------|--------|-------|-----------------------------|-------|---------------|--------------|--------------------------------|-------|
|                                | MMSE              |       | MoCA   |       | RBANS<br>Attention<br>(n=7) |       | TMT Task A    |              | RBANS<br>Visuospatial<br>(n=7) |       |
| V <sub>T</sub>                 | rho               | p     | rho    | p     | rho                         | p     | rho           | p            | rho                            | p     |
| Temporal                       | -0.079            | 0.818 | -0.320 | 0.337 | 0.055                       | 0.908 | -0.418        | 0.201        | 0.360                          | 0.427 |
| Prefrontal                     | -0.060            | 0.860 | -0.256 | 0.447 | 0.218                       | 0.638 | -0.364        | 0.272        | 0.396                          | 0.379 |
| Inf Parietal                   | 0.232             | 0.492 | -0.252 | 0.455 | 0.273                       | 0.554 | <b>-0.655</b> | <b>0.029</b> | 0.450                          | 0.310 |
| Occipital                      | -0.214            | 0.528 | -0.220 | 0.516 | 0.109                       | 0.816 | <b>-0.682</b> | <b>0.021</b> | 0.559                          | 0.192 |
| Hippocampus                    | 0.181             | 0.594 | -0.334 | 0.315 | -0.291                      | 0.527 | 0.000         | 1.000        | 0.180                          | 0.699 |

| Cognitive Measure<br>MCI (n=7) | EXECUTIVE FUNCTION |       |                                    |       |                                            |       |                                |       |
|--------------------------------|--------------------|-------|------------------------------------|-------|--------------------------------------------|-------|--------------------------------|-------|
|                                | TMT Task B         |       | Stroop Test<br>Color Task<br>(n=8) |       | Stroop Test<br>Color Word<br>Task<br>(n=8) |       | Letter Number<br>Span<br>(n=7) |       |
| V <sub>T</sub>                 | rho                | p     | rho                                | p     | rho                                        | p     | rho                            | p     |
| Temporal                       | -0.309             | 0.355 | 0.436                              | 0.280 | 0.167                                      | 0.693 | 0.118                          | 0.801 |
| Prefrontal                     | -0.245             | 0.467 | 0.546                              | 0.162 | 0.357                                      | 0.385 | 0.217                          | 0.641 |
| Inf Parietal                   | -0.382             | 0.247 | 0.655                              | 0.078 | 0.476                                      | 0.233 | 0.118                          | 0.801 |
| Occipital                      | -0.455             | 0.160 | 0.546                              | 0.162 | 0.167                                      | 0.693 | -0.079                         | 0.867 |
| Hippocampus                    | 0.009              | 0.979 | -0.078                             | 0.854 | -0.214                                     | 0.610 | -0.571                         | 0.180 |

**B. Correlations after partial volume error correction.**

| Cognitive Measure<br>MCI (n=7) | MEMORY                       |       |                            |       |                                     |              | LANGUAGE          |       |                          |       |
|--------------------------------|------------------------------|-------|----------------------------|-------|-------------------------------------|--------------|-------------------|-------|--------------------------|-------|
|                                | RBANS<br>Immediate<br>Memory |       | RBANS<br>Delayed<br>Memory |       | Logical Memory<br>Delayed<br>(n=11) |              | RBANS<br>Language |       | Verbal Fluency<br>(n=11) |       |
| $V_T$                          | rho                          | p     | rho                        | p     | rho                                 | p            | rho               | p     | rho                      | p     |
| Temporal                       | -0.536                       | 0.215 | 0.090                      | 0.848 | -0.356                              | 0.282        | -0.179            | 0.703 | 0.469                    | 0.145 |
| Prefrontal                     | -0.357                       | 0.432 | 0.595                      | 0.159 | -0.292                              | 0.383        | 0.500             | 0.253 | 0.551                    | 0.079 |
| Inf Parietal                   | -0.464                       | 0.294 | 0.703                      | 0.078 | -0.365                              | 0.269        | 0.429             | 0.337 | 0.433                    | 0.184 |
| Occipital                      | -0.536                       | 0.215 | 0.252                      | 0.585 | -0.457                              | 0.158        | -0.071            | 0.879 | 0.396                    | 0.228 |
| Hippocampus                    | -0.429                       | 0.337 | 0.360                      | 0.427 | <b>-0.639</b>                       | <b>0.034</b> | 0.000             | 1.000 | 0.150                    | 0.659 |

| Cognitive Measure<br>MCI (n=7) | GENERAL COGNITION |       |               |              | ATTENTION                   |       | VISUOSPATIAL |       |                                |       |
|--------------------------------|-------------------|-------|---------------|--------------|-----------------------------|-------|--------------|-------|--------------------------------|-------|
|                                | MMSE              |       | MoCA          |              | RBANS<br>Attention<br>(n=7) |       | TMT Task A   |       | RBANS<br>Visuospatial<br>(n=7) |       |
| $V_T$                          | rho               | p     | rho           | p            | rho                         | p     | rho          | p     | rho                            | p     |
| Temporal                       | -0.200            | 0.556 | -0.430        | 0.187        | -0.418                      | 0.350 | -0.345       | 0.298 | -0.234                         | 0.613 |
| Prefrontal                     | 0.111             | 0.744 | -0.348        | 0.295        | -0.091                      | 0.846 | -0.518       | 0.102 | 0.198                          | 0.670 |
| Inf Parietal                   | 0.079             | 0.818 | -0.481        | 0.135        | -0.145                      | 0.756 | -0.473       | 0.142 | 0.108                          | 0.818 |
| Occipital                      | -0.149            | 0.663 | -0.467        | 0.148        | -0.109                      | 0.816 | -0.491       | 0.125 | 0.234                          | 0.613 |
| Hippocampus                    | -0.116            | 0.734 | <b>-0.650</b> | <b>0.030</b> | -0.746                      | 0.054 | 0.109        | 0.750 | -0.468                         | 0.289 |

| Cognitive Measure<br>MCI (n=7) | EXECUTIVE FUNCTION |       |                                    |       |                                            |       |                                |       |
|--------------------------------|--------------------|-------|------------------------------------|-------|--------------------------------------------|-------|--------------------------------|-------|
|                                | TMT Task B         |       | Stroop Test<br>Color Task<br>(n=8) |       | Stroop Test<br>Color Word<br>Task<br>(n=8) |       | Letter Number<br>Span<br>(n=7) |       |
| $V_T$                          | rho                | p     | rho                                | p     | rho                                        | p     | rho                            | p     |
| Temporal                       | -0.300             | 0.370 | -0.031                             | 0.942 | -0.095                                     | 0.823 | 0.177                          | 0.704 |
| Prefrontal                     | -0.509             | 0.110 | 0.296                              | 0.476 | 0.143                                      | 0.736 | -0.118                         | 0.801 |
| Inf Parietal                   | -0.355             | 0.285 | 0.187                              | 0.657 | 0.048                                      | 0.911 | -0.118                         | 0.801 |
| Occipital                      | -0.364             | 0.272 | 0.109                              | 0.797 | -0.238                                     | 0.570 | 0.020                          | 0.967 |
| Hippocampus                    | 0.064              | 0.853 | -0.483                             | 0.225 | -0.357                                     | 0.385 | -0.335                         | 0.463 |
